# Supplementary material for: Knockdown of NCOR2 Inhibits Cell Proliferation via BDNF/TrkB/ERK in NF1-Derived MPNSTs
Source: Cancers (Basel). 2022 Nov 24;14(23):5798. doi: 10.3390/cancers14235798 (PMC9738545; doi:10.3390/cancers14235798)
Supplement: Supplementary file 1 [file cancers-14-05798-s001.zip › Supplementary figures and tables.pdf]

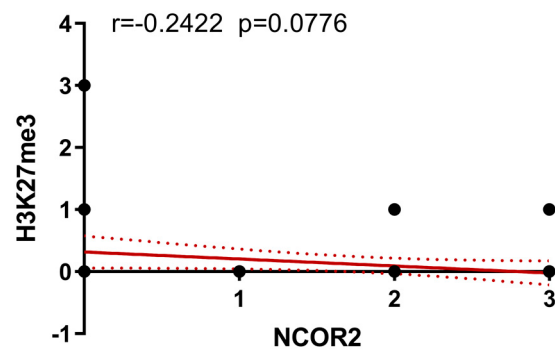

**Figure S1** The correlation between NCOR2 and H3K27me3. The results show that there is no correlation between NCOR2 and H3K27me3 (  $P=0.8472$  ).

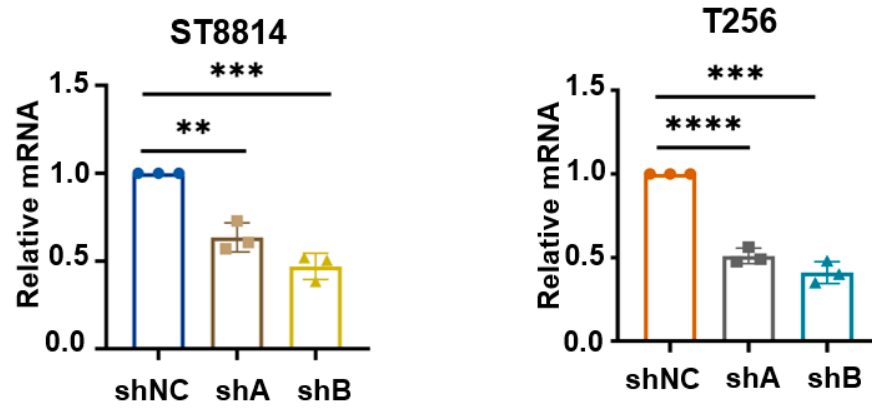

**Figure S2** qPCR showing that the efficacy of NCOR2 knockdown in ST8814 and T265 cells at mRNA levels; shB was selected for further investigation. Data were shown as the mean  $\pm$  S.D., n = 3; \*\*P<0.005; \*\*\*P<0.0005; \*\*\*\*P<0.0001.

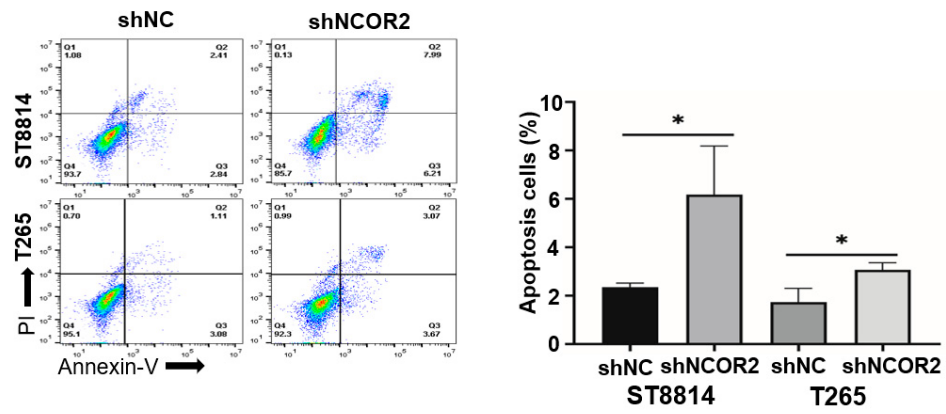

**Figure S3** FCM also showed that the shNCOR2 groups displayed a higher apoptosis rate. Data were shown as the mean  $\pm$  S.D.,  $n = 3$ ; \* $P < 0.05$ .

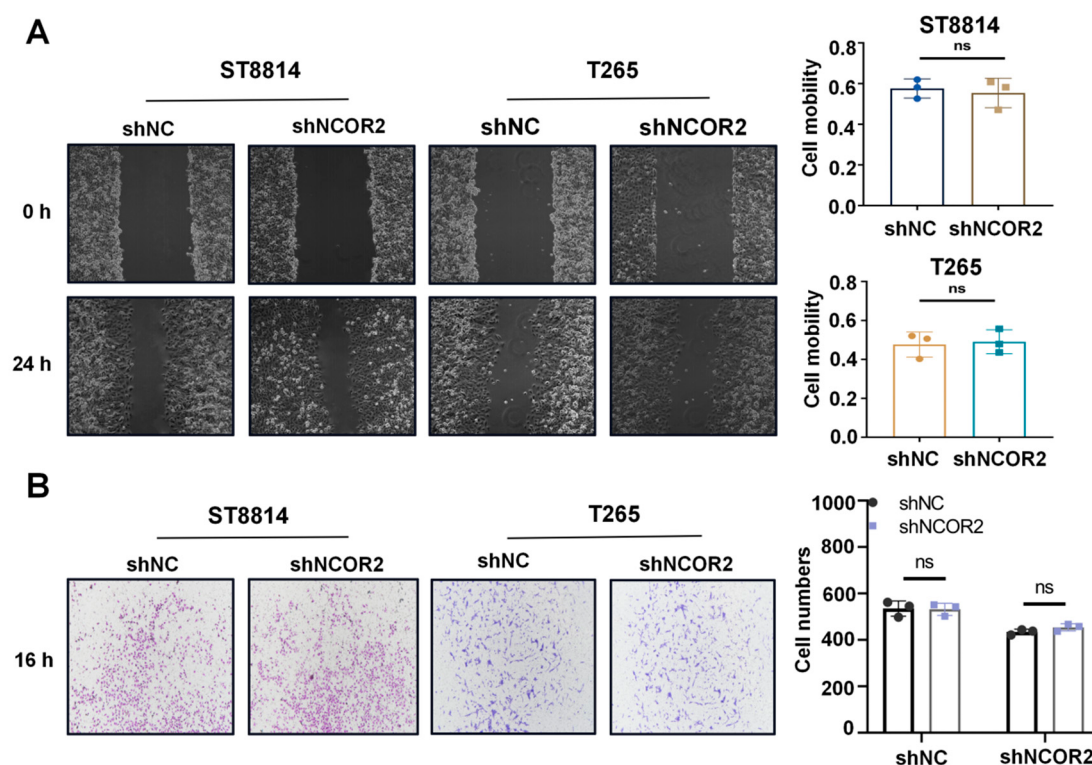

**Figure S4** NCOR2 knockdown does not affect the cell migration and invasion ability in NF1-derived MPNST cells. (A) Scratch assays showing that NCOR2 knockdown did not suppress ST8814 and T265 cell migration into the scratching area. Data were shown as the mean  $\pm$  S.D.,  $n = 3$ ; ns, not significant. (B) Matrigel-transwell invasion assay showing the invasive capability of NCOR2-knockdown ST8814 and T265 cells did not altered. Data were shown as the mean  $\pm$  S.D.,  $n = 3$ ; ns, not significant.

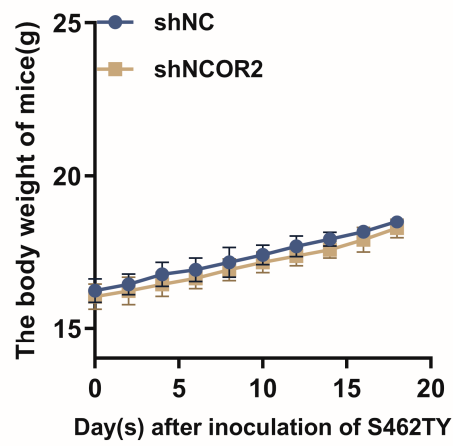

**Figure S5** There was no significant difference in the body weights of the mice. shNC, n=6; shNCOR2, n=6.

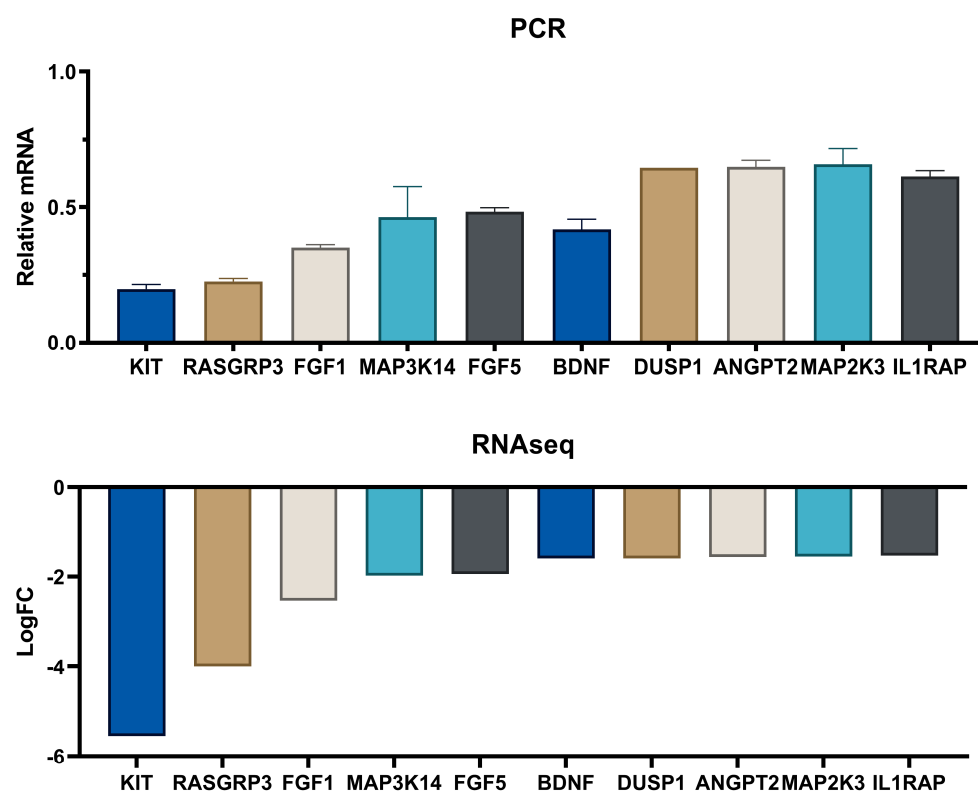

**Figure S6** qPCR showing that the change trend of top 10 downregulated genes expression in MAPK signalling pathway matched the RNA-Seq results.

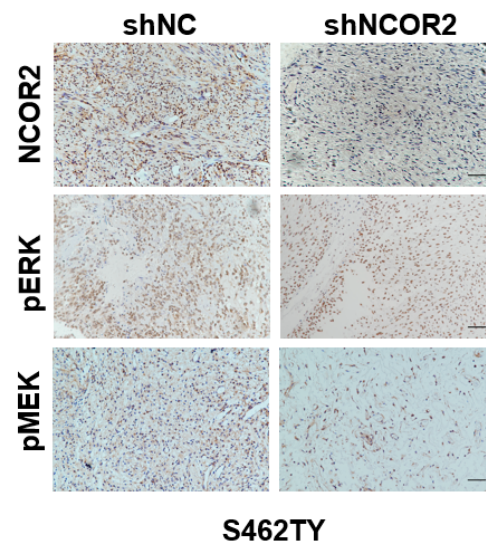

**Figure S7** IHC showing the positive expression of pERK and pMEK were decreased in NCOR2-knockdown S462TY cells. Scale bar, 50  $\mu$ M.

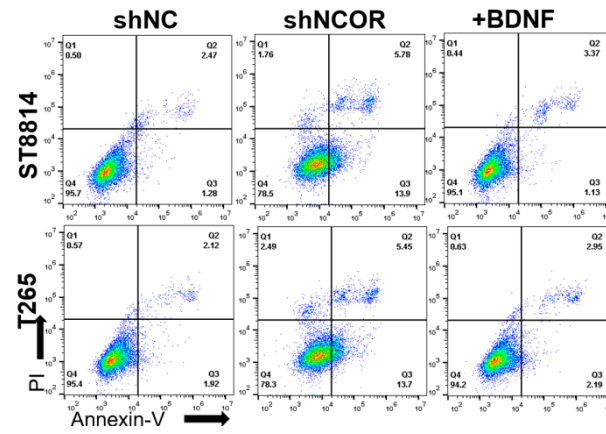

**Figure S8** FCM showing that the proportion of apoptotic cells decreased evidently after the ST8814-shNCOR2 and T265-shNCOR2 treated with human recombinant BDNF.

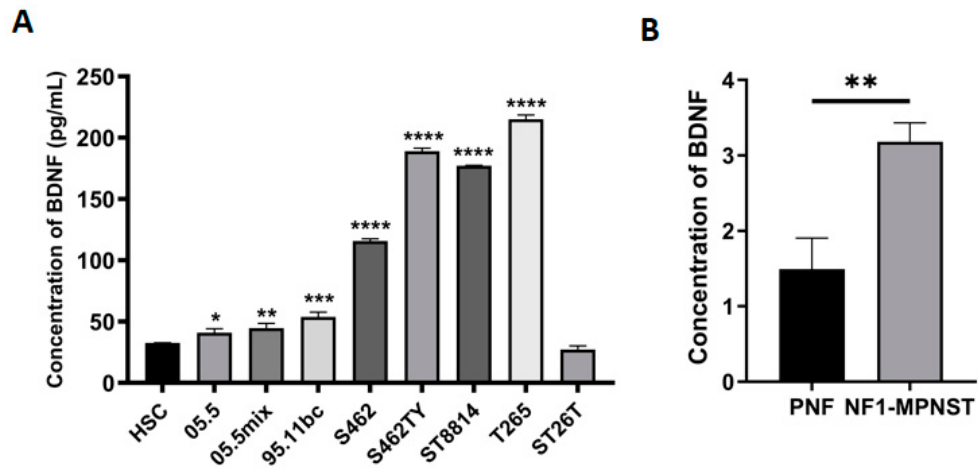

**Figure S9** BDNF content in cell supernatant and peripheral blood of patients. (A) ELISA showing that the content of BDNF secreted by NF1-derived MPNSTs (S462, S462TY, ST8814, T265) is significantly higher than that of other cell lines, especially those with high NCOR2 level. (B) ELISA showing that the content of BDNF in peripheral blood from NF1-derived MPNST patients was significantly higher than those from PNF patients. Data were shown as the mean  $\pm$  S.D.,  $n = 3$ ; \*\* $P < 0.005$ .

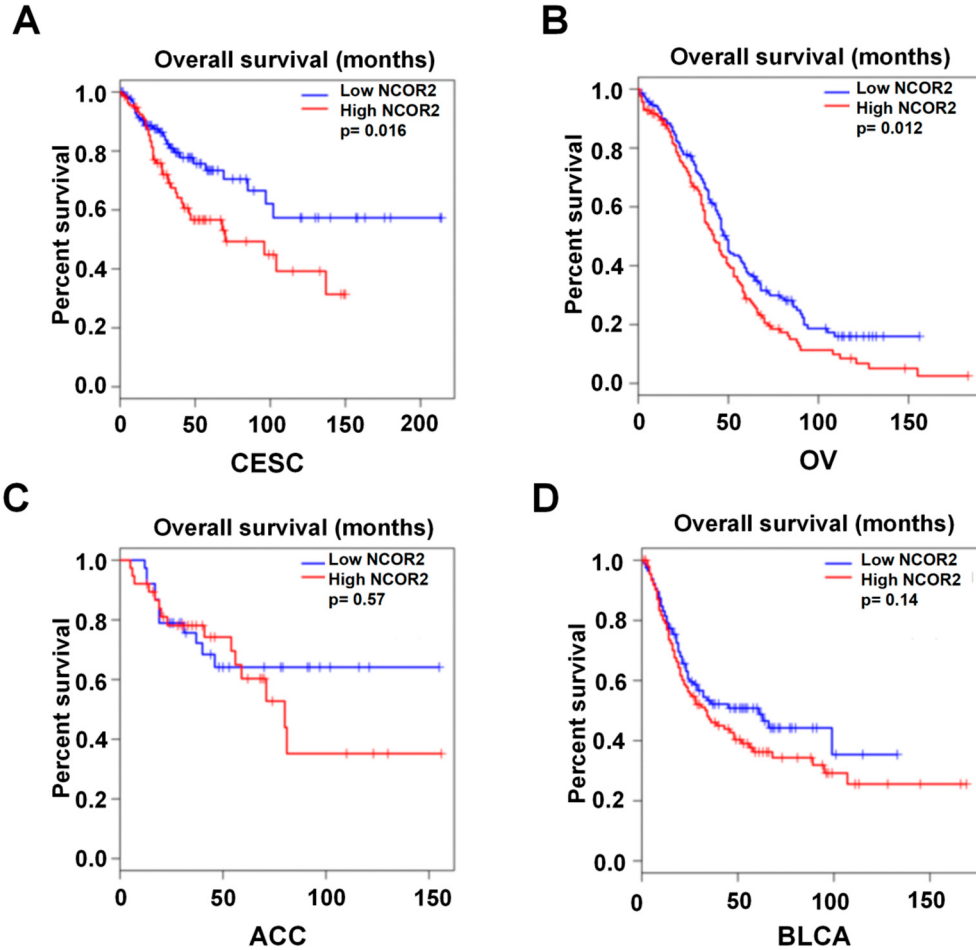

**Figure S10** The correlation between high NCOR2 levels and overall survival time was different in other tumours. (A, B) patients with elevated NCOR2 levels had shorter overall survival times in CESC and OV. (C, D) There was no correlation between the NCOR2 level and overall survival in ACC and BLCA. ACC: adrenocortical carcinoma; BLCA: bladder urothelial carcinoma; CESC: cervical squamous cell carcinoma and endocervical adenocarcinoma.

**Table S1. The differential diagnosis of NF1-associated nerve sheath tumours**

|                   |                                                                                                                                                                   |
|-------------------|-------------------------------------------------------------------------------------------------------------------------------------------------------------------|
| PNF               | Neurofibroma diffusely enlarging and replacing a nerve, often involving multiple nerve fascicles, delineated by EMA+ perineurial cells                            |
| ANNUBP            | Schwann cell neoplasm with at least 2 of 4 features: cytologic atypia, loss of neurofibroma architecture, hypercellularity, mitotic index 1/50 HPFs and 3/10 HPFs |
| MPNST, low-grade  | Features of ANNUBP, but with mitotic index of 3-9/10 HPFs and no necrosis                                                                                         |
| MPNST, High-grade | MPNST at least with mitotic index of 10/10 HPFs or 3-9/10 HPFs combined with necrosis                                                                             |

PNF: plexiform neurofibroma; ANNUBP: atypical neurofibromatous tumour of uncertain;  
 MPNST: malignant peripheral nerve sheath tumour; HPF: high-power field.

**Table S2. FNCLCC Histological Grading System**

| <b>tumour Differentiation</b>                                                             | <b>Score</b> |
|-------------------------------------------------------------------------------------------|--------------|
| Sarcoma closely resembling normal adult mesenchymal tissue                                | 1            |
| Sarcomas for which histologic typing is certain                                           | 2            |
| Embryonal and undifferentiated sarcomas, sarcomas of doubtful type, and synovial sarcomas | 3            |
| <b>Mitotic Count</b>                                                                      | <b>Score</b> |
| 0–9 mitoses per 10 HPF                                                                    | 1            |
| 10–19 mitoses per 10 HPF                                                                  | 2            |
| ≥20 mitoses per 10 HPF                                                                    | 3            |
| <b>tumour Necrosis</b>                                                                    | <b>Score</b> |
| No necrosis                                                                               | 0            |
| <50% tumour necrosis                                                                      | 1            |
| ≥50% tumour necrosis                                                                      | 2            |

FNCLCC: Fédération Nationale des Centres de Lutte Contre Le Cancer; HPF: high-power field.

**Table S3 Sequences of primers used in quantitative RT-PCR**

| <b>Target Gene</b> | <b>Primer</b> | <b>Nucleotide sequence (5' to 3')</b> |
|--------------------|---------------|---------------------------------------|
| NCOR2              | F             | GAGGTGTCAGAGATCATCGATG                |
|                    | R             | TCATGTTGATGAACCTTGATGCG               |
| KIT                | F             | CTACAGCCTTATGACGAAATGC                |
|                    | R             | CTTCTCTTCCTCCAGGATTGTG                |

|         |   |                          |
|---------|---|--------------------------|
| RASGRP3 | F | GATGAGGTGTTTGAGTTCCCT    |
|         | R | CTGTAGCCTCACAGAGATCTTG   |
| FGF1    | F | CACAGACACCAAATGAGGAATG   |
|         | R | CATTCTTCTTGAGGCCAACAAA   |
| MAP3K14 | F | GAATTGTCCCTTTGTATGGAGC   |
|         | R | ATCCTTCGTGAGTGGAGGTATT   |
| FGF5    | F | CCCACGAAGCCAATATGTTAAG   |
|         | R | CAC TTGCATGGAGTTTTCC TTT |
| BDNF    | F | GACACTTTCGAACACGTGATAG   |
|         | R | TACAAGTCTGCGTCCTTATTGT   |
| DUSP1   | F | AGGCCATTGACTTCATAGACTC   |
|         | R | AGTCCTCATAAGGTAAGCAAGG   |
| ANGPT2  | F | CAACACTCAGTGGCTAATGAAG   |
|         | R | GCATTCTGCTGTATCTCTACCA   |
| MAP2K3  | F | ATCTACAGCACCGACTATTACC   |
|         | R | GGTGA ACTTACGGTACAGGATG  |
| IL1RAP  | F | CAGAAAATGGACGTACGTTTCA   |
|         | R | TAGACCGTACAGGGAATGAGTA   |

**Table S4 Antibodies used for the western blot experiments.**

| <b>Antigen</b>                      | <b>Dilution</b> | <b>Catalogue</b> | <b>Source</b>  |
|-------------------------------------|-----------------|------------------|----------------|
| GAPDH                               | 1:5000          | #2118            | CST            |
| β-actin                             | 1:5000          | #3700            | CST            |
| NCOR2                               | 1:500           | D161011          | Sangon Biotech |
| MEK                                 | 1:1000          | #4694            | CST            |
| pMEK                                | 1:1000          | #9154            | CST            |
| ERK                                 | 1:1000          | #4696            | CST            |
| pERK                                | 1:1000          | #4370            | CST            |
| AKT                                 | 1:1000          | #4691            | CST            |
| pAKT                                | 1:1000          | #4060            | CST            |
| Caspase-3                           | 1:1000          | #9662            | CST            |
| Cleaved caspase-3                   | 1:1000          | #9661            | CST            |
| CDK4                                | 1:1000          | #12790           | CST            |
| CDK6                                | 1:1000          | #13331           | CST            |
| Cyclin D1                           | 1:1000          | #55506           | CST            |
| BDNF                                | 1:1000          | ab108319         | Abcam          |
| pTrkB                               | 1:1000          | ab134155         | Abcam          |
| anti-mouse<br>(Secondary antibody)  | 1:5000          | ab6728           | Abcam          |
| Anti-rabbit<br>(Secondary antibody) | 1:5000          | Ab6721           | Abcam          |

CST: Cell Signaling Technology, Massachusetts, US; Sangon Biotech: Shanghai, China; Abcam: Burlingame, California, US.

**Table S5 Antibodies used for the immunofluorescence experiments.**

| Antigen           | Dilution | Catalog  | Source         |
|-------------------|----------|----------|----------------|
| NCOR2             | 1:50     | D161011  | Sangon Biotech |
| Ki67              | 1:200    | #9449    | CST            |
| H3K27me3          | 1:100    | ab6002   | Abcam          |
| Cleaved caspase-3 | 1:400    | #9661    | CST            |
| pERK              | 1:200    | #4370    | CST            |
| BDNF              | 1:100    | ab108319 | Abcam          |
| pTrkB             | 1:100    | ab134155 | Abcam          |

CST: Cell Signaling Technology, Massachusetts, US; Sangon Biotech: Shanghai, China; Abcam: Burlingame, California, US.

**Table S6 The information of GEO datasets used in this study.**

| GSE14038               |                                                                                                                                                                                                                             | GSE41747                                                                                                                                                                                                                                                                                                     |
|------------------------|-----------------------------------------------------------------------------------------------------------------------------------------------------------------------------------------------------------------------------|--------------------------------------------------------------------------------------------------------------------------------------------------------------------------------------------------------------------------------------------------------------------------------------------------------------|
| Website                | <a href="https://www.ncbi.nlm.nih.gov/geo/query/acc.cgi?acc=GSE14038">https://www.ncbi.nlm.nih.gov/geo/query/acc.cgi?acc=GSE14038</a>                                                                                       | <a href="https://www.ncbi.nlm.nih.gov/geo/query/acc.cgi?acc=GSE41747">https://www.ncbi.nlm.nih.gov/geo/query/acc.cgi?acc=GSE41747</a>                                                                                                                                                                        |
| Organism               | Homo sapiens                                                                                                                                                                                                                | Mouse/Homo sapiens                                                                                                                                                                                                                                                                                           |
| Country                | USA                                                                                                                                                                                                                         | USA                                                                                                                                                                                                                                                                                                          |
| Platform               | GPL7869                                                                                                                                                                                                                     | GPL10371/GPL14757                                                                                                                                                                                                                                                                                            |
| Patient population     | 32 patients                                                                                                                                                                                                                 | 83 patients                                                                                                                                                                                                                                                                                                  |
| Data processing        | Microarrays were analyzed with Affymetrix Microarray Suite 5.0 to generate "CEL" files that were processed using Robust Multichip Analysis (RMA) in Bioconductor/R. A custom CDF was used (Brainarray, Hs133P_Hs_REFSEQ_8). | Microarrays were analyzed with Affymetrix Microarray Suite 5.0 to generate "CEL" files that were processed using Robust Multichip Analysis (RMA) in Bioconductor/R. A custom CDF was used for each species (mouse: Brainarray, Mouse4302_Mm_REFSEQ_11.0.1; Human, Brainarray, HGU133Plus2_Hs_REFSEQ_11.0.1). |
| Age, Sex, Stage, Grade | <a href="https://www.ncbi.nlm.nih.gov/geo/query/acc.cgi?acc=GSE14038">https://www.ncbi.nlm.nih.gov/geo/query/acc.cgi?acc=GSE14038</a>                                                                                       | <a href="https://www.ncbi.nlm.nih.gov/geo/query/acc.cgi?acc=GSE28245">https://www.ncbi.nlm.nih.gov/geo/query/acc.cgi?acc=GSE28245</a>                                                                                                                                                                        |

**Table S7 Clinical features of fresh NF1-derived MPNST tissue samples**

| Patients |        |     | Histological Findings |      | Clinical Features |     |     |       |                |
|----------|--------|-----|-----------------------|------|-------------------|-----|-----|-------|----------------|
| ID       | Gender | Age | H&E                   | S100 | CALMs             | CNF | PNF | MPNST | Family History |
| P1       | Female | 9   | Benign                | +    | Y                 | N   | Y   | N     | Y              |
| P2       | male   | 19  | Benign                | +    | Y                 | N   | Y   | N     | N              |
| P3       | male   | 29  | Benign                | +    | Y                 | N   | Y   | Y     | N              |
| P4       | Female | 29  | Malignant             | +    | Y                 | Y   | N   | Y     | N              |
| P5       | Female | /   | Malignant             | +    | Y                 | N   | Y   | Y     | /              |
| P6       | male   | 29  | Malignant             | +    | Y                 | N   | Y   | Y     | N              |

**Table S8 Abnormal BDNF/TrkB signal in the nerve-derived tumours**

| <b>Year</b> | <b>Author</b>      | <b>Signal</b>               | <b>tumour Type</b>                                 | <b>biomedical functional impacts</b>                           |
|-------------|--------------------|-----------------------------|----------------------------------------------------|----------------------------------------------------------------|
| 1995        | Matsumoto K et al. | BDNF and TrkB overexpressed | Neuroblastoma                                      | Cell survival, differentiation, invasiveness                   |
| 1998        | Tajima Y et al.    | BDNF and TrkB overexpressed | Medulloblastomas, glial tumours, ependymal tumours | Neuronal survival                                              |
| 1999        | Encinas M et al.   | BDNF/TrkB/Ras/MAPK          | Neuroblastoma                                      | Neuronal differentiation                                       |
| 1999        | Encinas M et al.   | BDNF/TrkB/PI3K/AKT          | Neuroblastoma                                      | Neuronal survival                                              |
| 2002        | Ho R et al.        | BDNF/TrkB/PI3K/AKT          | Neuroblastoma                                      | Drug resistance                                                |
| 2002        | Jaboin J et al.    | BDNF/TrkB/PI3K              | Neuroblastoma                                      | Drug resistance                                                |
| 2005        | LI Z et al.        | BDNF/TrkB/PI3K/AKT          | Neuroblastoma                                      | Drug resistance                                                |
| 2006        | Nakamura K et al.  | BDNF/TrkB/PI3K/mTOR/VEGF    | Neuroblastoma                                      | Angiogenesis                                                   |
| 2015        | Xiong J et al.     | BDNF and TrkB overexpressed | Glioma                                             | Positively associated with malignancy grade                    |
| 2016        | Hua Z et al.       | BDNF/TrkB/PI3K/mTOR         | Neuroblastoma                                      | Cell metastasis<br>Cell growth, cell survival and self-renewal |
| 2019        | Wang X et al.      | BDNF/TrkB/VGF               | Glioblastoma                                       |                                                                |

**Table S9 TrkB fusions in the nerve-derived tumours**

| <b>Year</b> | <b>Author</b>             | <b>Fusion Protein</b> | <b>Chromosomal Location</b> | <b>tumour Type</b>                          |
|-------------|---------------------------|-----------------------|-----------------------------|---------------------------------------------|
| 2013        | Jones, D. T et al.        | NACC2-NTKR2           | 9q34.3                      | Pilocytic astrocytoma<br>pilocytic          |
| 2013        | Jones, D. T et al.        | QKI-NTKR2             | 6q26                        | Astrocytoma                                 |
| 2013        | Frattini, V et al.        | QKI-NTKR2             | 6q26                        | Glioblastomas                               |
| 2013        | Zhang, J et al.           | NAVI-NTKR2            | 1q32.1                      | Dysembryoplastic<br>neuroepithelial tumours |
| 2014        | Stransky, N et al.        | AFAP1-NTKR2           | 4p16.1                      | Low-grade glioma                            |
| 2014        | Wu, G et al.              | QKI-NTKR2             | 6q26                        | high-grade Glioma                           |
| 2014        | Stransky, N et al.        | AGBL4-NTKR2           | 1p33                        | Glioblastomas                               |
| 2014        | Stransky, N et al.        | VCL-NTKR2             | 10q22.2                     | Glioblastomas                               |
| 2014        | Stransky, N et al.        | PML-NTKR2             | 15q24.1                     | Pilocytic astrocytoma                       |
| 2016        | Qaddoumi, I et al.        | SL-MAP NTRK2          | 3p14.3                      | Gangliogliomas                              |
| 2017        | López, G. Y et al.        | KANK1-NTKR2           | 9p24.3                      | Pilocytic astrocytoma                       |
| 2018        | Prabhakaran, N<br>et al.  | TLE4-NTKR2            | 9q21.31                     | Gangliogliomas                              |
| 2019        | Jones, K et al.           | BCR-NTKR2             | 22q11.23                    | Low-grade glioma                            |
| 2020        | Khuong-Quang<br>DA et al. | SPECC1L-NTRK2         | 22q12.15                    | Low-grade<br>neuroepithelial tumour         |
| 2020        | Khuong-Quang<br>DA et al. | SPECC1L-NTRK2         | 22q11.15                    | Anaplastic astrocytoma                      |
| 2020        | Pattwell SS et al.        | PML-NTRK2             | 15q24.1                     | pilocytic astrocytoma                       |
| 2021        | Gupte A et al.            | BCR-NTKR2             | 22q11.23                    | spinal gangliocytoma                        |
| 2021        | Deland L et al.           | GKAP1-NTRK2           | 9q21.32                     | low-grade glioma                            |
